# Supplementary material for: Predicting In-Hospital Antibiotic Use in the Medical Department: Derivation and Validation Study
Source: MDPI journal article supplement (doi:10.3390/antibiotics11060813), 2022-06-16
Supplement: s1 [file s1]

## Patient flow diagram

### Derivation cohort – Beilinson Hospital

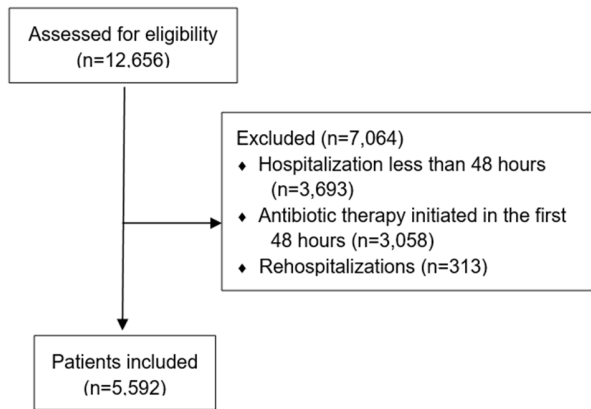

### Validation cohort – Hasharon Hospital

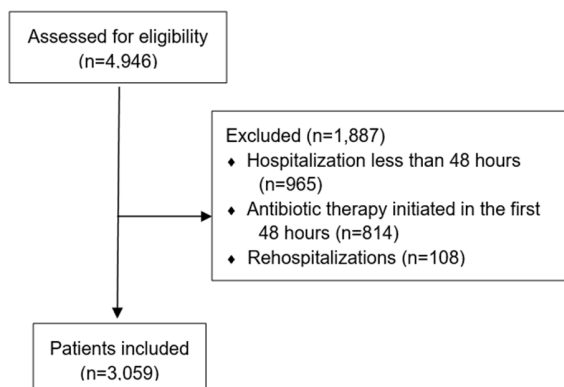

### Validation cohort – Rambam Health Care Campus

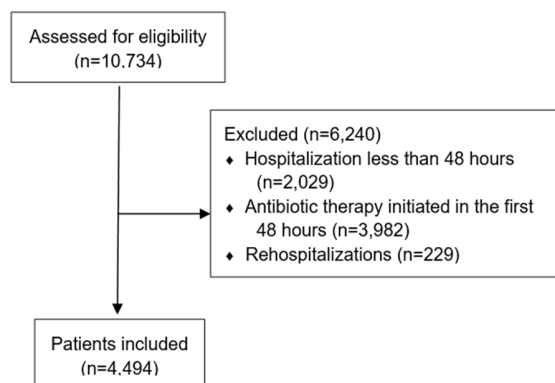

## Performance Metrics

| Medical Center                   | Probability Thresholds | Sensitivity | Specificity | Positive Predictive Value | Negative Predictive Value | Accuracy |
|----------------------------------|------------------------|-------------|-------------|---------------------------|---------------------------|----------|
| <b>Beilinson</b>                 | 0.04                   | 0.89        | 0.29        | 0.1                       | 0.97                      | 0.34     |
|                                  | 0.06                   | 0.76        | 0.55        | 0.13                      | 0.96                      | 0.56     |
|                                  | 0.085*                 | 0.63        | 0.72        | 0.17                      | 0.95                      | 0.72     |
|                                  | 0.1                    | 0.52        | 0.8         | 0.18                      | 0.95                      | 0.77     |
| <b>Hasharon</b>                  | 0.04                   | 0.87        | 0.37        | 0.06                      | 0.98                      | 0.4      |
|                                  | 0.06                   | 0.72        | 0.65        | 0.09                      | 0.98                      | 0.65     |
|                                  | 0.085*                 | 0.49        | 0.79        | 0.10                      | 0.97                      | 0.78     |
|                                  | 0.1                    | 0.45        | 0.84        | 0.12                      | 0.97                      | 0.82     |
| <b>Rambam Health Care Campus</b> | 0.04                   | 0.96        | 0.13        | 0.09                      | 0.97                      | 0.20     |
|                                  | 0.06                   | 0.84        | 0.45        | 0.13                      | 0.97                      | 0.49     |
|                                  | 0.085*                 | 0.69        | 0.69        | 0.17                      | 0.96                      | 0.69     |
|                                  | 0.1                    | 0.62        | 0.77        | 0.20                      | 0.95                      | 0.76     |

\* Youden's index
